# Supplementary material for: IFN-γ independent markers of Mycobacterium tuberculosis exposure among male South African gold miners
Source: PubMed Central journal article supplement (PMC10320233; doi:10.1016/j.ebiom.2023.104678), 2023-06-26
Supplement: mmc2.pdf [file mmc2.pdf]

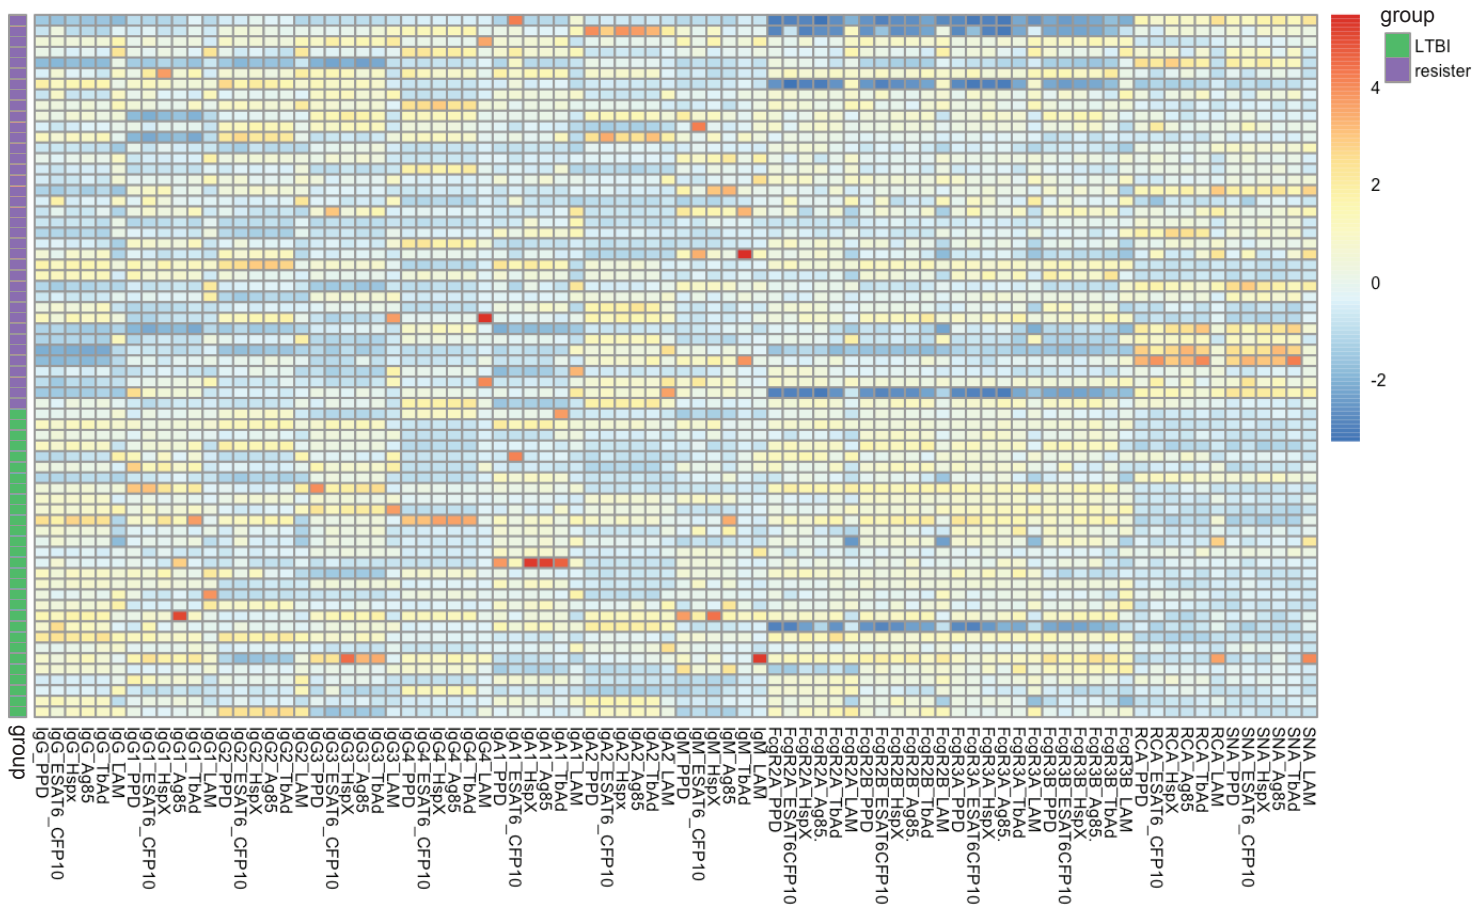

**Supplementary Figure 2. Summary heatmap of M.tb-specific antibody data.** Luminex was used to measure antibody responses in isotype, subclass, FcR binding, and Fc glycosylation against a panel of M.tb antigens. Heatmap indicates all generated antibody data, Z-scored by assay. Each row represents one individual, and each column represents a single antigen-specific antibody assay.
