# Supplementary material for: IFN-γ independent markers of Mycobacterium tuberculosis exposure among male South African gold miners
Source: PubMed Central journal article supplement (PMC10320233; doi:10.1016/j.ebiom.2023.104678), 2023-06-26
Supplement: mmc3.pdf [file mmc3.pdf]

|                                  |               | <b>RSTR</b> | <b>LTBI</b> | <b>p value</b> |
|----------------------------------|---------------|-------------|-------------|----------------|
| <b><u>T cell profiling</u></b>   | N             | 23          | 23          |                |
| <b>Sex</b>                       | Male          | 23 (100%)   | 23 (100%)   |                |
| <b>Age, years</b>                | Mean          | 47.0        | 49.7        | 0.23           |
|                                  | SD            | 6.6         | 4.1         |                |
| <b>BMI</b>                       | Mean          | 28.5        | 29.1        | 0.34           |
|                                  | SD            | 5.2         | 3.7         |                |
| <b>Country of birth</b>          | South Africa  | 17 (73.9%)  | 18 (78.3%)  | 0.18           |
|                                  | Lesotho       | 1 (4.4%)    | 4 (17.9%)   |                |
|                                  | Mozambique    | 2 (8.7%)    | 0 (0%)      |                |
|                                  | Other         | 3 (13.0%)   | 1 (4.4%)    |                |
| <b>Ethnicity</b>                 | Black/African | 16 (69.6%)  | 23 (100%)   | 0.0041         |
|                                  | Other         | 7 (30.4%)   | 0 (0%)      |                |
| <b>Working underground</b>       | Yes           | 18 (78.3%)  | 15 (65.2%)  | 0.33           |
| <b>Years worked underground</b>  | Mean          | 21.20       | 24.3        | 0.16           |
|                                  | SD            | 6.90        | 5.50        |                |
| <b>Live in mine housing</b>      | Yes           | 8 (32.8%)   | 11 (47.8%)  | 0.37           |
|                                  |               |             |             |                |
| <b><u>Antibody profiling</u></b> | N             |             |             |                |
| <b>Sex</b>                       | Male          | 37          | 30          |                |
| <b>Age, years</b>                | Mean          | 41 (100%)   | 30 (100%)   | 0.43           |
|                                  | SD            | 47.1        | 49.0        |                |
| <b>BMI</b>                       | Mean          | 7.0         | 4.6         | 0.11           |
|                                  | SD            | 28.4        | 30.2        |                |
| <b>Country of birth</b>          | South Africa  | 4.9         | 5.5         | 0.32           |
|                                  | Lesotho       | 26 (70.3%)  | 23 (76.7%)  |                |
|                                  | Mozambique    | 2 (5.4%)    | 4 (13.3%)   |                |
|                                  | Other         | 5 (13.5%)   | 1 (3.3%)    |                |
| <b>Ethnicity</b>                 | Black/African | 4 (10.8%)   | 2 (6.7%)    | 0.001          |
|                                  | Other         | 26 (70.3%)  | 30 (100%)   |                |
| <b>Working underground</b>       | Yes           | 11 (29.7%)  | 0 (0%)      | 0.83           |
| <b>Years worked underground</b>  | Mean          | 28 (75.7%)  | 22 (73.3%)  | 0.66           |
|                                  | SD            | 22.6        | 22.8        |                |
| <b>Live in mine housing</b>      | Yes           | 6.7         | 8.0         | 0.47           |

**Supplementary Table 1. Demographic data for subjects included in T cell and antibody analyses.** RSTR and LTBI groups were compared using Mann-Whitney U test (age, BMI, years worked underground) and Chi squared test (sex, country of birth, ethnicity, working underground, and live in mine housing). BMI: body mass index, SD: standard deviation.
