# Supplementary material for: IFN-γ independent markers of Mycobacterium tuberculosis exposure among male South African gold miners
Source: PubMed Central journal article supplement (PMC10320233; doi:10.1016/j.ebiom.2023.104678), 2023-06-26
Supplement: mmc4.pdf [file mmc4.pdf]

| <b>Reagent</b>     | <b>Catalog number</b>        |
|--------------------|------------------------------|
| Streptavidin-APC   | Life Technologies Cat#S868   |
| Streptavidin-ECD   | Life Technologies Cat#SA1017 |
| Streptavidin-BV510 | BioLegend Cat#405234         |
| Streptavidin-BV650 | BioLegend Cat#405232         |

**Supplementary Table 2. Fluorophore-conjugated streptavidin reagents used for generation of tetramers.**

| <b>Reagent</b>                             | <b>Catalog number</b>         | <b>RRID</b> |
|--------------------------------------------|-------------------------------|-------------|
| LIVE/DEAD Fixable Aqua Dead Cell Stain Kit | Life Technologies Cat# L34966 | N/A         |
| CD3 ECD                                    | Beckman Coulter Cat# IM2705U  | AB_130860   |
| CD4 APC-A750                               | Beckman Coulter Cat# A94685   | AB_2927448  |
| CD8 PerCP-Cy5.5                            | BD Biosciences Cat# 341051    | AB_400209   |
| IFN- $\gamma$ V450                         | BD Biosciences Cat# 560371    | AB_1645594  |
| TNF FITC                                   | BD Biosciences Cat# 554512    | AB_395443   |
| IL-2 PE                                    | BD Biosciences Cat# 559334    | AB_397231   |
| IL-4 APC                                   | BD Biosciences Cat# 554486    | AB_398562   |
| CD154 PE-Cy5                               | BD Biosciences Cat# 555701    | AB_396051   |
| IL-17a AF700                               | BioLegend Cat# 512318         | AB_2124868  |

**Supplementary Table 3. Antibody cocktail used for ICS.**

| <b>Reagent</b>                   | <b>Catalog number</b>            | <b>RRID</b> |
|----------------------------------|----------------------------------|-------------|
| CD3 BUV395                       | BD Biosciences Cat# 563546       | AB_2744387  |
| CD4 APC-H7                       | BD Biosciences Cat# 560837       | AB_10563933 |
| CD8 $\beta$ BB700                | BD Biosciences Cat# 742229       | AB_2740667  |
| CD45RA BUV737                    | BD Biosciences Cat# 612846       | AB_2870168  |
| CD14 BV785                       | BioLegend Cat# 301840            | AB_2563425  |
| CD19 BV785                       | BioLegend Cat# 363028            | AB_2564257  |
| TRAV1-2 BV605                    | BioLegend Cat# 351720            | AB_2563991  |
| V $\delta$ 2 AF700               | BioLegend Cat# 331416            | AB_2687085  |
| Pan- $\gamma$ $\delta$ PE-Vio770 | Miltenyi Biotec Cat# 130-113-505 | AB_2733288  |

**Supplementary Table 4. Antibody cocktail used for combinatorial tetramer panel staining.**

| <b>Reagent</b>                     | <b>Catalog number</b>                   | <b>RRID</b> |
|------------------------------------|-----------------------------------------|-------------|
| IgG PE                             | Southern BioTech Cat#9040-09            | AB_2796601  |
| IgG1 PE                            | Southern BioTech Cat#9052-09            | AB_2796621  |
| IgG2 PE                            | Southern BioTech Cat#9070-09            | AB_2796639  |
| IgG3 PE                            | Southern BioTech Cat#9210-09            | AB_2796701  |
| IgG4 PE                            | Southern BioTech Cat#9200-09            | AB_2796693  |
| IgA1 PE                            | Southern BioTech Cat#9130-09            | AB_2796656  |
| IgA2 PE                            | Southern BioTech Cat#9140-09            | AB_2796664  |
| IgM PE                             | Southern BioTech Cat#9020-09            | AB_2796577  |
| Recombinant human Fc $\gamma$ R2A  | Duke University Protein Production Core | N/A         |
| Recombinant human Fc $\gamma$ R2B  | Duke University Protein Production Core | N/A         |
| Recombinant human Fc $\gamma$ R3A  | Duke University Protein Production Core | N/A         |
| Recombinant human Fc $\gamma$ R3B  | Duke University Protein Production Core | N/A         |
| Sambuca nigra agglutinin FITC      | VectorLabs Cat#FL-1301                  | N/A         |
| Ricinus communis agglutinin I FITC | RCA, VectorLabs Cat#FL-1081             | N/A         |

**Supplementary Table 5. Secondary detection reagents used for Luminex antibody assays.**
